# Supplementary material for: Grinding Characteristics of New Varieties of Winter Triticale Grain
Source: MDPI journal article supplement (doi:10.3390/pr11051477), 2023-05-12
Supplement: s1 [file s1]

**The air temperature (°C) - decadal and monthly averages and precipitation  
(mm) - decadal and monthly totals (Czesławice)**

| No. | Month     | Decade               | 2019        |             | 2020        |              | 2021        |              |
|-----|-----------|----------------------|-------------|-------------|-------------|--------------|-------------|--------------|
|     |           |                      | Temp.       | Precip.     | Temp.       | Precip.      | Temp.       | Precip.      |
| 1   | January   | I                    | -4.6        | 11.8        | 0.8         | 8.6          | 1.2         | 9.7          |
|     |           | II                   | -1.4        | 15.2        | 1.4         | 3.2          | -0.6        | 1.9          |
|     |           | III                  | -4.1        | 4.5         | 1.5         | 2.3          | -0.2        | 20.1         |
|     |           | <b>average/total</b> | <b>-3.4</b> | <b>31.5</b> | <b>1.2</b>  | <b>14.1</b>  | <b>0.1</b>  | <b>31.7</b>  |
| 2   | February  | I                    | 2.3         | 3.7         | 2.6         | 39.8         | -5.2        | 18.2         |
|     |           | II                   | 3.4         | 1.3         | 4.3         | 6.2          | -5.2        | 22.6         |
|     |           | III                  | 1.7         | 9.6         | 2.8         | 30.5         | 3.9         | 1.6          |
|     |           | <b>average/total</b> | <b>2.5</b>  | <b>14.6</b> | <b>3.2</b>  | <b>76.5</b>  | <b>-2.2</b> | <b>42.4</b>  |
| 3   | March     | I                    | 5.1         | 16.0        | 5.0         | 19.8         | 1.0         | 0.5          |
|     |           | II                   | 4.9         | 10.9        | 6.3         | 5.4          | 2.1         | 5.9          |
|     |           | III                  | 6.5         | 0.2         | 2.9         | 0.8          | 4.8         | 8.5          |
|     |           | <b>average/total</b> | <b>5.5</b>  | <b>27.1</b> | <b>4.7</b>  | <b>26.0</b>  | <b>2.6</b>  | <b>14.9</b>  |
| 4   | April     | I                    | 9.2         | 2.0         | 7.4         | 0.0          | 5.0         | 6.9          |
|     |           | II                   | 8.2         | 3.5         | 7.4         | 0.0          | 6.8         | 11.1         |
|     |           | III                  | 13.5        | 33.5        | 11.0        | 19.0         | 7.3         | 40.3         |
|     |           | <b>average/total</b> | <b>10.3</b> | <b>39.0</b> | <b>8.6</b>  | <b>19.0</b>  | <b>6.4</b>  | <b>58.3</b>  |
| 5   | May       | I                    | 11.0        | 1.3         | 11.0        | 41.7         | 9.6         | 30.6         |
|     |           | II                   | 15.1        | 74.8        | 10.6        | 7.7          | 12.0        | 20.0         |
|     |           | III                  | 17.0        | 10.9        | 11.9        | 62.0         | 13.3        | 17.4         |
|     |           | <b>average/total</b> | <b>14.4</b> | <b>87.0</b> | <b>11.2</b> | <b>111.4</b> | <b>11.6</b> | <b>68.0</b>  |
| 6   | June      | I                    | 21.5        | 0.0         | 16.2        | 56.6         | 16.0        | 3.5          |
|     |           | II                   | 24.3        | 2.0         | 18.4        | 53.6         | 21.7        | 28.2         |
|     |           | III                  | 2.8         | 9.2         | 19.1        | 60.1         | 18.1        | 36.6         |
|     |           | <b>average/total</b> | <b>16.2</b> | <b>11.2</b> | <b>17.9</b> | <b>170.3</b> | <b>18.6</b> | <b>68.3</b>  |
| 7   | July      | I                    | 18.9        | 12.3        | 19.4        | 16.4         | 20.7        | 50.2         |
|     |           | II                   | 18.7        | 8.6         | 17.6        | 50.8         | 23.6        | 18.0         |
|     |           | III                  | 22.5        | 25.4        | 19.4        | 0.6          | 21.6        | 14.2         |
|     |           | <b>average/total</b> | <b>20.0</b> | <b>46.3</b> | <b>18.8</b> | <b>67.8</b>  | <b>22.0</b> | <b>82.4</b>  |
| 8   | August    | I                    | 21.5        | 20.3        | 21.3        | 8.1          | 18.3        | 52.7         |
|     |           | II                   | 21.2        | 29.5        | 20.5        | 3.0          | 19.0        | 28.2         |
|     |           | III                  | 23.1        | 2.2         | 19.6        | 48.2         | 14.4        | 116.9        |
|     |           | <b>average/total</b> | <b>21.9</b> | <b>52.0</b> | <b>20.5</b> | <b>59.3</b>  | <b>17.2</b> | <b>197.8</b> |
| 9   | September | I                    | 19.8        | 8.0         | 15.8        | 29.2         | 13.9        | 2.5          |
|     |           | II                   | 14.7        | 9.3         | 16.2        | 4.0          | 14.8        | 36.7         |
|     |           | III                  | 14.3        | 16.2        | 14.9        | 95.3         | 10.5        | 17.9         |

|    |          |                      |             |             |             |              |             |             |
|----|----------|----------------------|-------------|-------------|-------------|--------------|-------------|-------------|
|    |          | <b>average/total</b> | <b>16.3</b> | <b>33.5</b> | <b>15.6</b> | <b>128.5</b> | <b>13.1</b> | <b>57.1</b> |
| 10 | October  | I                    | 10.0        | 30.7        | 14.2        | 18.0         | 11.1        | 0.0         |
|    |          | II                   | 12.6        | 6.3         | 8.2         | 57.8         | 8.0         | 6.8         |
|    |          | III                  | 15.1        | 0.0         | 10.2        | 17.6         | 9.1         | 0.0         |
|    |          | <b>average/total</b> | <b>12.6</b> | <b>37.0</b> | <b>10.9</b> | <b>93.4</b>  | <b>9.4</b>  | <b>6.8</b>  |
| 11 | November | I                    | 8.0         | 48.8        | 7.7         | 14.4         | 7.5         | 11.0        |
|    |          | II                   | 9.1         | 3.4         | 6.0         | 1.5          | 5.2         | 1.6         |
|    |          | III                  | 2.8         | 4.1         | 1.8         | 1.5          | 2.9         | 13.8        |
|    |          | <b>average/total</b> | <b>6.6</b>  | <b>56.3</b> | <b>5.2</b>  | <b>17.4</b>  | <b>5.2</b>  | <b>26.4</b> |
| 12 | December | I                    | 0.6         | 3.8         | 0.8         | 0.2          | -1.1        | 4.7         |
|    |          | II                   | 3.4         | 38.5        | 1.4         | 0.5          | 0.9         | 4.8         |
|    |          | III                  | 3.8         | 4.0         | 3.4         | 15.3         | -3.1        | 21.3        |
|    |          | <b>average/total</b> | <b>2.6</b>  | <b>46.3</b> | <b>1.9</b>  | <b>16.0</b>  | <b>-1.1</b> | <b>30.8</b> |
